# Supplementary material
Source: PubMed Central journal article supplement (PMC2859499)
Supplement: supp_M109.083246_jbc.M109.083246-1.pdf [file supp_M109.083246_jbc.M109.083246-1.pdf]

# Supplementary Data 1

**A**

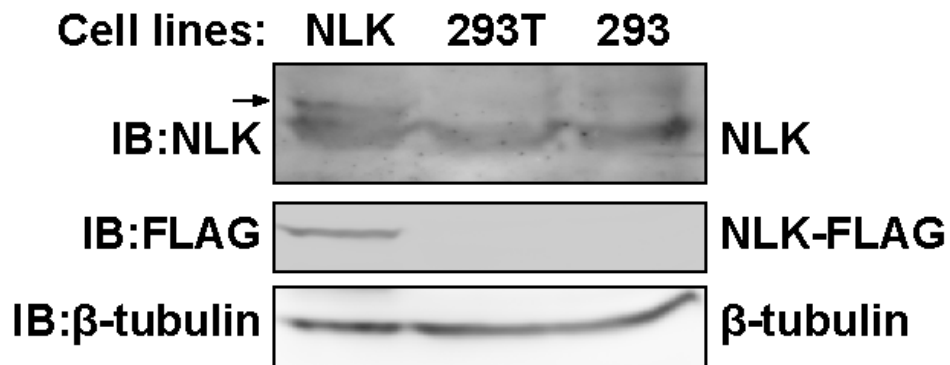

**B**

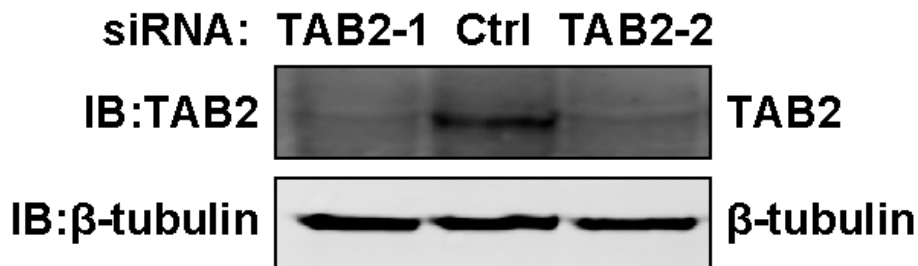

**C**

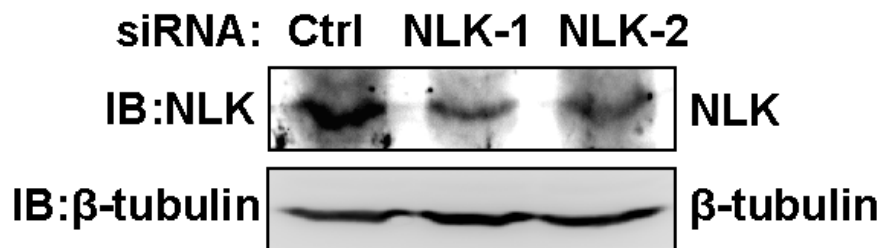

**S1.** (A) The protein level of endogenous NLK in different cell lines was evaluated by Western Blot. The arrow points out the stable transfected FLAG-tagged NLK in NLK-293 cells. (B, C) RNAi efficiencies of TAB2 or NLK siRNAs were showed. HEK293T cells were transfected with control or specific TAB2 or NLK siRNAs, and then total cell lysates were harvested 48 h later for Western blot.

## Supplementary Data 2

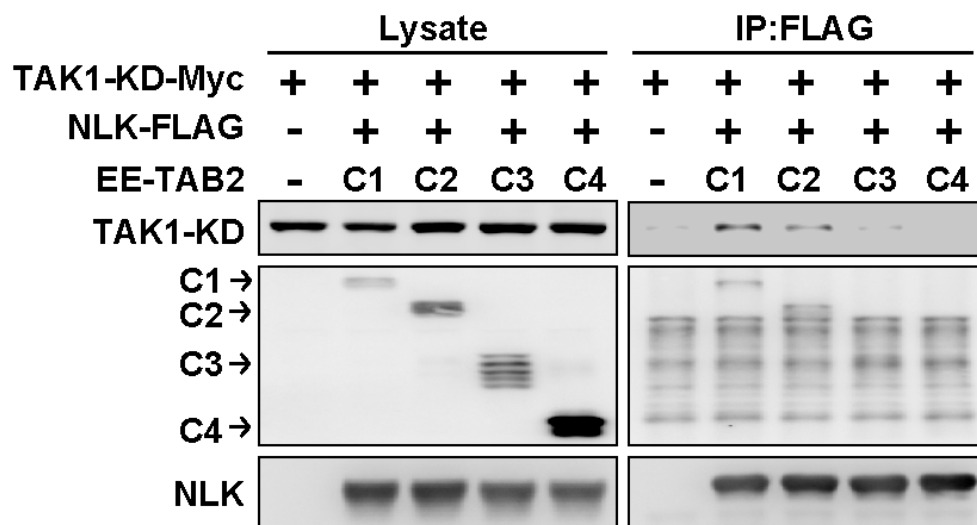

**S2.** Scaffolding abilities of TAB2-C1, C2, C3 and C4 for TAK1 and NLK were evaluated through Co-IP assays in HEK293T cells.

## Supplementary Data 3

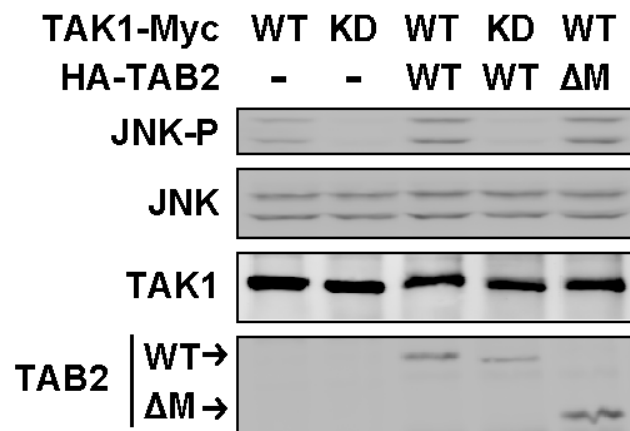

**S3.** Both TAB2 and TAB2- $\Delta$ M potentiates TAK1-mediated JNK phosphorylation in HEK293T cells. JNK and phospho-JNK (JNK-P) antibody were used to check the activation of JNK.
